# Supplementary material for: Novel Function of lncRNA ADAMTS9-AS2 in Promoting Temozolomide Resistance in Glioblastoma via Upregulating the FUS/MDM2 Ubiquitination Axis
Source: Front Cell Dev Biol. 2019 Oct 2;7:217. doi: 10.3389/fcell.2019.00217 (PMC6783494; doi:10.3389/fcell.2019.00217)
Supplement: DATA SHEET S1 — The certificates of cell authenticity by STR analysis. The data sheet contains original STR analysis results, as well as final certification report of glioma cells. [file Data_Sheet_1.ZIP]

Archive with 6 entries (5 files):
- STR genotyping/
- STR genotyping/STR genotyping report.doc
- STR genotyping/T98G_1_A03.fsa
- STR genotyping/T98G_2_A04.fsa
- STR genotyping/u118_2_B03.fsa
- STR genotyping/u118_2_B04.fsa
